# Supplementary material for: Human Lipoxygenase Pathway Gene Variation and Association with Markers of Subclinical Atherosclerosis in the Diabetes Heart Study
Source: Hindawi journal article supplement (doi:10.1155/2010/170153), 2010-01-01
Supplement: f1 [file 170153.f1.pdf]

**Supplementary Table 1.** Gene Nomenclature, LD block and physical location, alleles, minor allele frequencies, and P-values for deviation from Hardy Weinberg equilibrium (HWE).

| Gene                         | LD Block | dbSNP      | PGA*  | Site       | Alleles<br>1 / 2 | Allele 2<br>Frequency | HWE<br>P-value |
|------------------------------|----------|------------|-------|------------|------------------|-----------------------|----------------|
| <i>ALOX12</i><br>(1 block)   | -        | rs9904779  | 1158  | 5' of gene | G/C              | 0.41                  | 0.825          |
|                              | 1        | rs2292350  | 4216  | Intron 2   | G/A              | 0.41                  | 0.045          |
|                              | -        | rs2271316  | 17947 | 3' of gene | G/C              | 0.42                  | 0.737          |
| <i>ALOX15</i><br>(2 blocks)  | -        | rs11568061 | 190   | 5' of gene | C/T              | 0.19                  | 0.111          |
|                              | 2        | rs2515889  | 9429  | Intron 8   | G/C              | 0.12                  | 0.073          |
|                              | 1        | rs2619112  | 11256 | Intron 2   | C/T**            | 0.44                  | 0.191          |
| <i>ALOX5</i><br>(8 blocks)   | 1        | rs745986   | -     | Intron 2   | A/G              | 0.18                  | 0.031          |
|                              | 2        | rs2115819  | -     | Intron 3   | T/C              | 0.45                  | 1              |
|                              | 3        | rs892691   | -     | Intron 4   | G/A              | 0.29                  | 0.313          |
|                              | 4        | rs3780906  | -     | Intron 6   | G/A              | 0.28                  | 0.085          |
|                              | 7        | rs2291427  | -     | Intron 8   | G/A              | 0.34                  | 0.129          |
| <i>ALOX5AP</i><br>(5 blocks) | -        | rs17222919 | 660   | 5' of gene | T/G              | 0.16                  | 0.7            |
|                              | 1        | rs4769055  | 2161  | Intron 1   | A/C              | 0.31                  | 0.223          |
|                              | 2        | rs10507391 | 4431  | Intron 1   | A/T              | 0.33                  | 0.338          |
|                              | 3        | rs9551960  | 9276  | Intron 1   | G/A              | 0.42                  | 0.007          |
|                              | 4        | rs9506352  | 13151 | Intron 2   | G/A              | 0.32                  | 0.465          |
|                              | 5        | rs4769060  | 30231 | Intron 4   | A/G              | 0.43                  | 0.915          |

\* Program in Genomic Application (PGA) identifier (<http://pga.gs.washington.edu/>)

\*\* PGA site polymorphism: C/T; dbSNP and HapMap site polymorphism: A/G
